## RETRACTION

# Retraction: Improving boron use efficiency via different application techniques for optimum production of good quality potato (*Solanum tuberosum* L.) in alkaline soil

The *PLOS ONE* Editors

The *PLOS ONE* Editors retract this article [1] because it was identified as one of a series of submissions for which we have concerns about authorship, competing interests, and peer review. We regret that the issues were not addressed prior to the article's publication.

MT, BA, MAdnan, IAM, SK, SF, MHS, MAlI, MM, MAhmad, MR, and SA did not agree with the retraction. MSC and MAES either did not respond directly or could not be reached.

## Reference

1. Tariq M, Ahmad B, Adnan M, Mian IA, Khan S, Fahad S, et al. (2022) Improving boron use efficiency via different application techniques for optimum production of good quality potato (*Solanum tuberosum* L.) in alkaline soil. *PLoS ONE* 17(1): e0259403. <https://doi.org/10.1371/journal.pone.0259403> PMID: 35085256

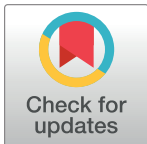

## OPEN ACCESS

**Citation:** The *PLOS ONE* Editors (2022) Retraction: Improving boron use efficiency via different application techniques for optimum production of good quality potato (*Solanum tuberosum* L.) in alkaline soil. *PLoS ONE* 17(8): e0272193. <https://doi.org/10.1371/journal.pone.0272193>

**Published:** August 3, 2022

**Copyright:** © 2022 The *PLOS ONE* Editors. This is an open access article distributed under the terms of the [Creative Commons Attribution License](https://creativecommons.org/licenses/by/4.0/), which permits unrestricted use, distribution, and reproduction in any medium, provided the original author and source are credited.
